# Supplementary material for: Integrated Analysis of the Transcriptome and Metabolome Revealed the Molecular Mechanisms Underlying the Enhanced Salt Tolerance of Rice Due to the Application of Exogenous Melatonin
Source: Front Plant Sci. 2021 Jan 14;11:618680. doi: 10.3389/fpls.2020.618680 (PMC7840565; doi:10.3389/fpls.2020.618680)
Supplement: Supplementary Table 8 — Sixty-four metabolites exclusively increased in 02428 seedling under salt and melatonin treatment. [file Table_8.XLSX]

## Sheet: Table S8
Table S8. Sixty-four metablites exclusively increased in 02428 seedling under salt and melatonin treatment
Metabolite ID	Metabolite Name	Log2FC	P-value	VIP
mws0024	Gallic acid	16.0117	0.00219307	1.27595
mws0058	Diosmetin	0.767264	0.0497311	1.15204
mws0103	Indole-3-carboxaldehyde	0.767264	0.0497311	1.15204
mws0145	2-Methoxybenzoic acid	2.51522	0.0441382	1.15748
mws0147	3-Hydroxy-3-methyl butyric acid	0.665662	0.0255081	1.13283
mws0237	Anchoic Acid	1.57087	0.00111426	1.28002
mws0255	Cytosine	1.25974	0.000410686	1.27746
mws0256	L-Valine	0.623721	0.00460803	1.24017
mws0260	L-(+)-Arginine	0.724116	0.00280621	1.25663
mws0274	Phenyllactate, PLA	1.71404	0.0128848	1.23527
mws0474	Dodecanedioic acid	0.65451	0.0239047	1.16996
mws0491	Phenethylamine	1.65611	0.0392532	1.11063
mws0574	Hydroxyisobutyric acid	0.761294	0.00744638	1.19094
mws0629	Asp	1.45286	0.00153898	1.27511
mws0636	Phe-Phe	0.952058	0.0117592	1.22039
mws0736	N-Glycyl-L-leucine	1.01561	0.00989174	1.24673
mws0813	5-Oxoproline	0.969968	0.00962325	1.21014
mws0976	Pseudouridine	1.35107	0.00419166	1.25932
mws1048	Cyanidin 3-O-galactoside	2.2335	0.00642103	1.25907
mws1060	9-(D-Arabinofuranosyl)hypoxanthine	0.930845	0.0430118	1.13002
mws1205	N-Acetyl-N-2-formyl-5-methoxykynurenamine	6.05643	0.0159135	1.25152
mws1346	DL-2-Aminoadipic acid	2.65509	0.0118884	1.25304
mws1383	Lumichrome	2.40844	0.030034	1.21702
mws1715	Cordycepin	1.44571	0.0329238	1.20958
mws4176	DL-Alanyl-DL-phenylalanine	0.741789	0.0327654	1.10983
mws5040	Turanose	2.0227	0.0136939	1.21132
mws5041	Glycylisoleucine	1.03151	0.00875395	1.24712
mws5042	Glycylphenylalanine	1.32051	0.00716449	1.25655
pmb1587	4-Hydroxy-3,5-diisopropylbenzaldehyde	0.720434	0.0328031	1.20845
pmb2319	LysoPC 15:0	1.04626	0.0173929	1.18945
pmb2786	9-HOTrE	1.61946	0.00239036	1.24114
pmb2787	9-oxooctadeca-10,12-dienoic acid，9-KODE	2.47628	0.00405566	1.27751
pmb2799	12,13-EODE	1.42987	0.0080934	1.24539
pme0026	L-(+)-Lysine	0.882568	0.0109426	1.2381
pme0120	5-Aminovaleric acid	0.636522	0.0202626	1.14355
pme0128	D-Alanyl-D-Alanine	1.21978	0.00217172	1.23858
pme0193	L-Glutamine	0.781911	0.012102	1.17031
pme0253	N-Acetyl-L-leucine	3.69839	2.05591e-07	1.28376
pme0295	4-Acetamidobutyric acid	0.98617	0.00534222	1.22164
pme1173	Allopurinol	0.892158	0.0221191	1.18848
pme1184	Deoxyguanosine	1.28925	0.0206443	1.23513
pme1187	5-Methyluridine	2.39144	0.0113044	1.2485
pme1194	Deoxycytidine	0.731586	0.00669859	1.22555
pme1228	5-Hydroxy-L-tryptophan	1.14781	0.0105011	1.18279
pme1453	Melatonin	5.74301	0.00139645	1.28098
pme2049	2-Hydroxybutanoic acid	1.2095	0.0207784	1.22486
pme2122	Histamine	1.09097	0.0166687	1.23755
pme2559	N-Acetylaspartate	1.28583	0.0375414	1.15426
pme2596	4-Pyridoxic acid	0.783396	0.0451304	1.15531
pme2634	DL-Norvaline	0.636756	0.00148868	1.25666
pme2743	N-Phenylacetylglycine	2.52964	0.0361935	1.19753
pme2996	4-Hydroxycoumarin	2.96887	0.00954091	1.25505
pme3033	N,N-Dimethylglycine	0.633531	0.00740428	1.24196
pme3154	Mevalonic acid	12.9638	0.00915886	1.26859
pme3188	Uridine 5'-monophosphate	1.10024	0.00745479	1.22665
pme3961	Deoxyadenosine	1.1095	0.0133847	1.24513
pme3967	2-(Dimethylamino)guanosine	2.57715	6.20095e-05	1.27667
pme3968	7-Methylguanine	0.784523	0.0396714	1.13463
pmn001380	Eucommiol	1.58446	3.25114e-05	1.28031
pmn001686	10,16-Dihydroxy-palmitic acid	11.9415	0.0140804	1.25716
pmp000009	Centaureidin	0.907785	0.041016	1.06907
pmp000578	Luteolin-7-O-glucuronide	1.60313	0.0491413	1.17603
pmp000602	6-Hydroxymusizin-8-O-B-D-glucoside	13.8985	0.00304364	1.27257
pmp001119	3,5-Dihydroxy-2,4-dimethoxy-9H-fluoren-9-one	1.16071	0.0275183	1.17071
