# Supplementary material for: Integrated Analysis of the Transcriptome and Metabolome Revealed the Molecular Mechanisms Underlying the Enhanced Salt Tolerance of Rice Due to the Application of Exogenous Melatonin
Source: Front Plant Sci. 2021 Jan 14;11:618680. doi: 10.3389/fpls.2020.618680 (PMC7840565; doi:10.3389/fpls.2020.618680)
Supplement: Supplementary Table 10 — KEGG annotation of the exclusively decreased metabolites in 02428 seedling under salt + melatonin treatment relative to control. [file Table_10.XLSX]

## Sheet: TableS10
Table S10. KEGG annotation of the exclusively decreased metabolites in 02428 seedling under salt plus melatonin treatment
Metabolite ID	Compounds	KEGG_annotation	KEGG_pathway_annotation
mws0180	2,5-Dihydroxybenzoic acid	C00628	Tyrosine metabolism(ko00350)
pme3184	2'-Deoxyadenosine-5'-monophosphate	C00360	Purine metabolism(ko00230)
pme3279	2'-Hydroxygenistein	C12134	Isoflavonoid biosynthesis(ko00943)
pme0088	Luteolin	C01514	Flavonoid biosynthesis(ko00941)
mws1002	Syringetin	C11620	Flavone and flavonol biosynthesis(ko00944)
mws1434	Isovitexin	C01714	Flavone and flavonol biosynthesis(ko00944)
mws0119	Myristic Acid	C06424	Fatty acid biosynthesis(ko00061)
pmn001578	Hexadecanoic acid	C00249	Fatty acid biosynthesis(ko00061)
mws0639	2,3-Dihydroxybenzoic Acid	C00196	Biosynthesis of secondary metabolites(ko01110)
Zmhn001926	Salicylic acid O-glycoside	--	unknown
Zmhn002173	Saponarin 4-O-glycoside	--	unknown
Zmhn002422	Feruloyl glucose	--	unknown
Zmxn001997	isosalicylic acid O-glycoside	--	unknown
mws0851	Sodium Valproate	--	unknown
mws1200	Trans-4-Hydroxycinnamic Acid Methyl Ester	--	unknown
mws1212	Methyl ferulate	--	unknown
mws1599	2-Picolylamine	--	unknown
pmb0423	Hydroxy-methoxycinnamate	--	unknown
pmb0666	6-C-Hexosyl-apigenin O-sinapoylhexoside	--	unknown
pmb0896	N'-Feruloyl putrescine	--	unknown
pmb2260	LysoPC 15:1	--	unknown
pmb2554	5-O-Feruloyl quinic acid glucoside	--	unknown
pmb2833	3-O-Feruloyl quinic acid glucoside	--	unknown
pmb2997	Chrysoeriol O-hexosyl-O-hexosyl-O-Glucuronic acid	--	unknown
pmb2999	Chrysoeriol 5-O-hexoside	--	unknown
pmb3006	Apigenin 7-O-glucoside(Cosmosiin)	--	unknown
pme0170	N-Acetyl-L-arginine	--	unknown
pme1611	Isohemiphloin	--	unknown
pme3443	Sinapinaldehyde	--	unknown
pmn001375	1-Hydroxyterpinin monoglucoside	--	unknown
pmn001384	Isochlorogenic acid C	--	unknown
pmn001419	1-O-[(E)-p-Cumaroyl]-D-glucopyranose	--	unknown
pmn001553	Cimidahurinine	--	unknown
pmn001614	Kaempferol-3,7-O-L-rhamnoside	--	unknown
pmn001644	Quercetin 3-O--(2''-O-acetyl-D-glucuronide)	--	unknown
pmn001682	Sorbic acid	--	unknown
pmn001710	Rosmarinyl Glucoside	--	unknown
pmp000003	Nepetin	--	unknown
pmp000120	Diosmetin-6-C-glucoside	--	unknown
pmp001164	Iristectorin B	--	unknown
pmp001309	6-Hydroxykaempferol-7-O-glucoside	--	unknown
